# Supplementary material for: Mesoporous zirconium phosphonate materials as efficient water-tolerable solid acid catalysts
Source: Royal Society of Chemistry journal article supplement (doi:10.1039/c4cy01110d), 2014-11-19
Supplement: c4cy01110d1.pdf [file c4cy01110d1.pdf]

## Mesoporous zirconium phosphonate materials as efficient water-tolerable solid acid catalysts

Xiu-Zhen Lin<sup>a</sup>, Tie-Zhen Ren<sup>b</sup> and Zhong-Yong Yuan<sup>\*a</sup>

<sup>a</sup> Key Laboratory of Advanced Energy Materials Chemistry (Ministry of Education),  
Collaborative Innovation Center of Chemical Science and Engineering (Tianjin), College of  
Chemistry, Nankai University, Tianjin 300071, China. E-mail: zyyuan@nankai.edu.cn

<sup>b</sup> School of Chemical Engineering and Technology, Hebei University of Technology, Tianjin  
300130, China

### Supporting Information

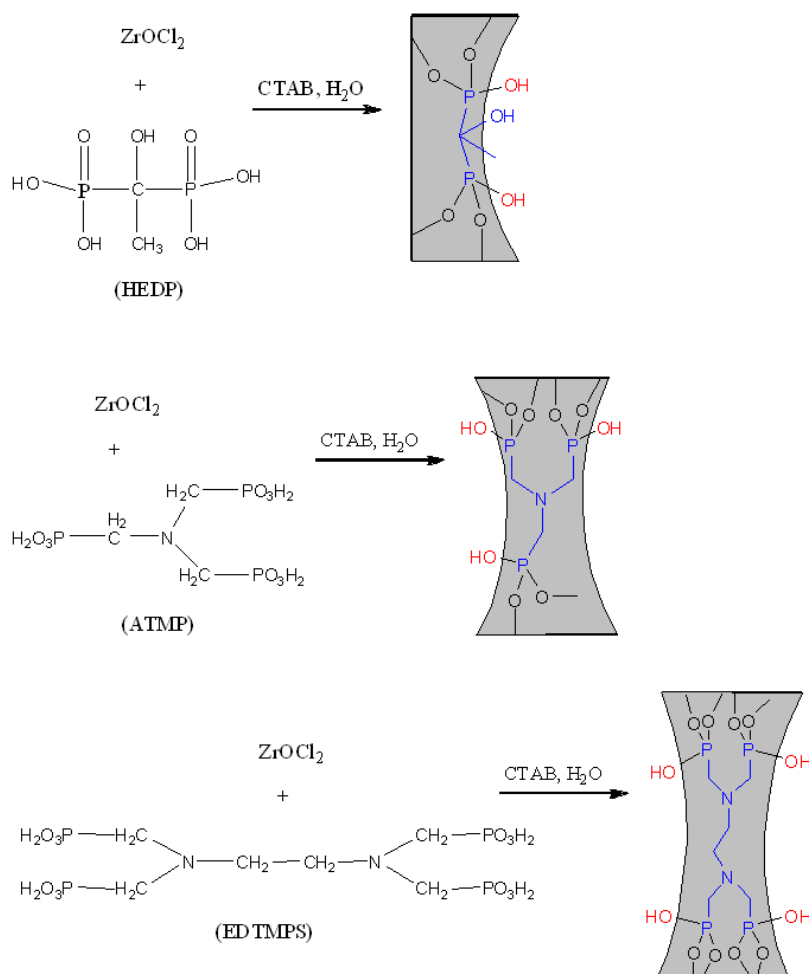

**Scheme S1.** Synthesis of three hybrid mesostructured zirconium phosphonates.

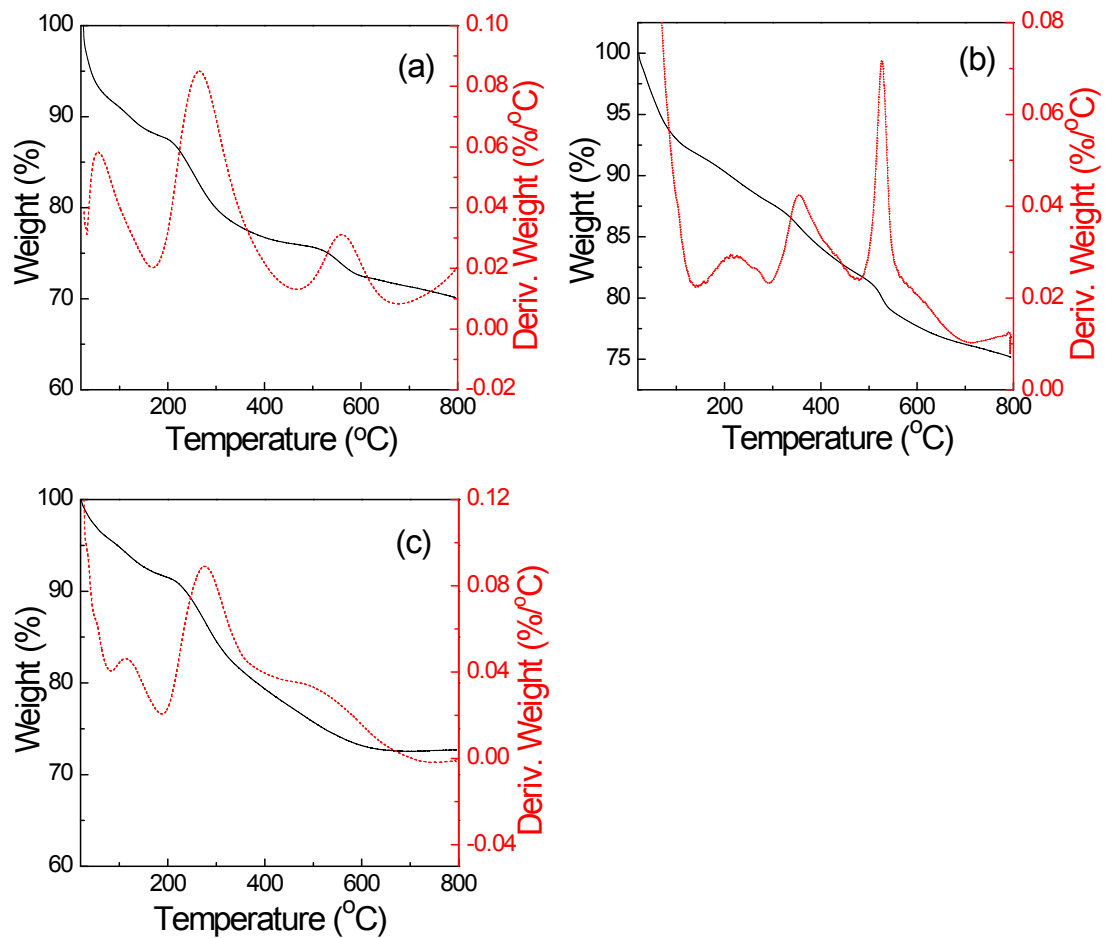

**Fig. S1** TG-DTG curves of the synthesized materials: (a) ZrHEDP, (b) ZrATMP and (c) ZrEDTMPS.
